# Supplementary material for: Amino Surface Modification and Fluorescent Labelling of Porous Hollow Organosilica Particles: Optimization and Characterization
Source: MDPI journal article supplement (doi:10.3390/ma15072696), 2022-04-06
Supplement: s1 [file s1]

# Amino Surface Modification and Fluorescent Labelling of Porous Hollow Organosilica Particles: Optimization and Characterization

Mohammed A. Al-Khafaji, Anikó Gaál, Bálint Jezsó, Judith Mihály and Zoltán Varga

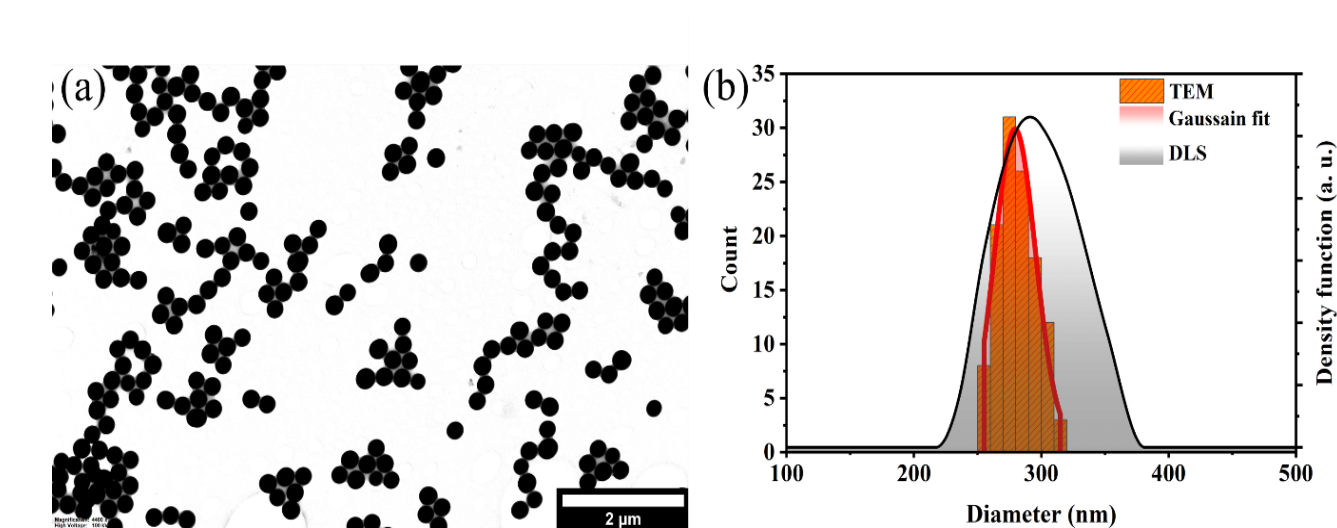

Figure S1. (a) TEM image and (b) PSD together with Gaussian fit and DLS measurements for solid SiO<sub>2</sub> core particles.

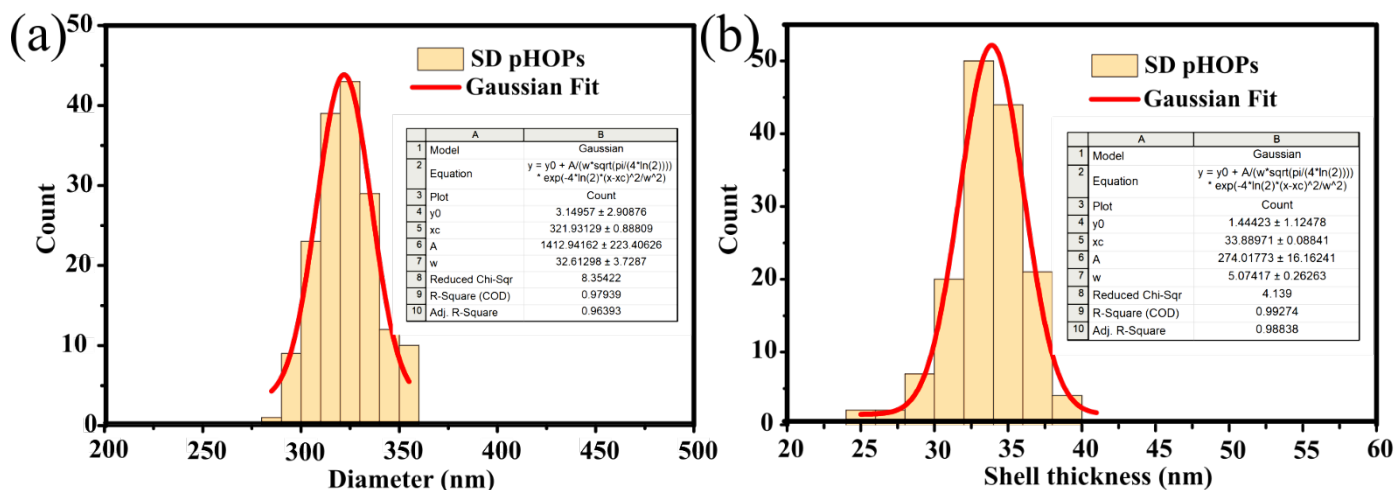

Figure S2. PSDs and Gaussian fit of porous hollow organosilica particles (a) and shell thickness (b).

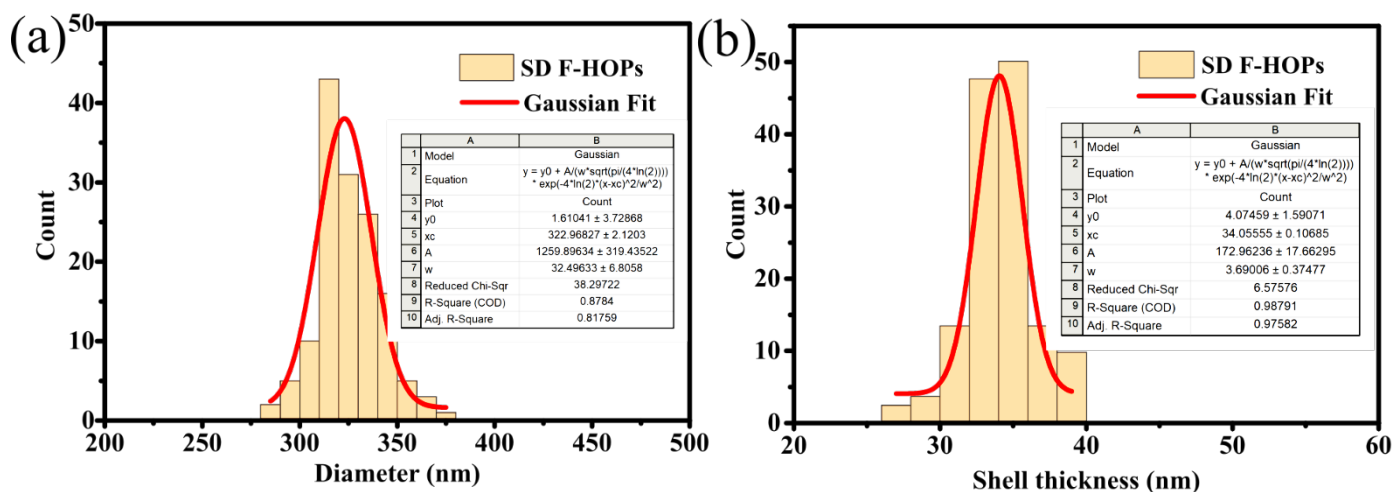

Figure S3. PSDs and Gaussian fit of florescent porous hollow organosilica particles (a) and shell thickness (b).

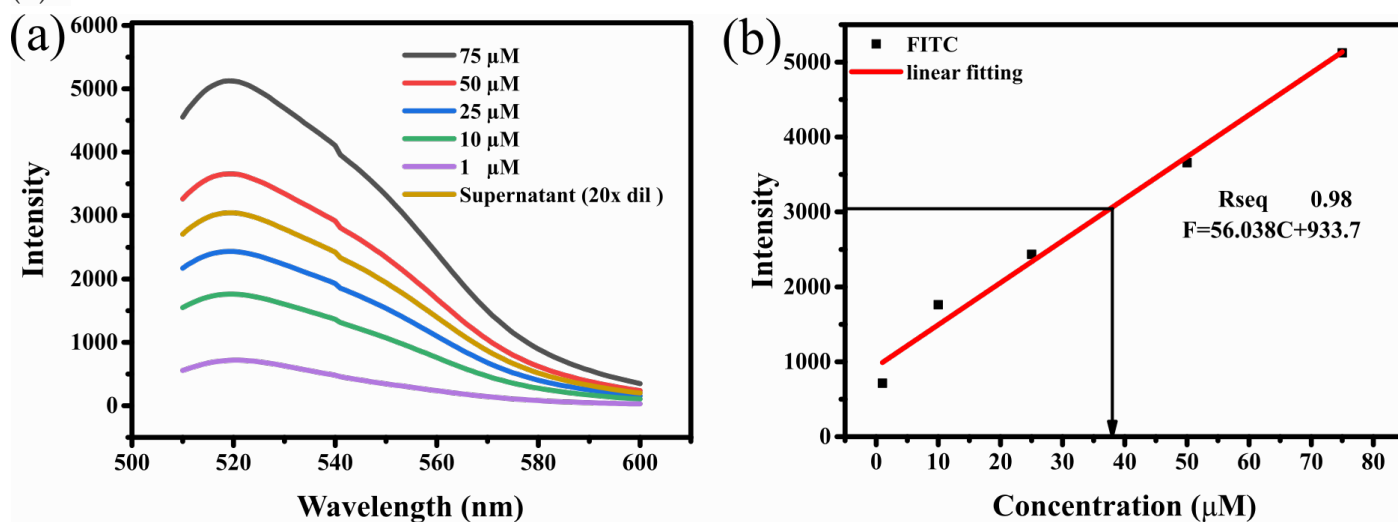

Figure S4. (a) Fluorescent emission spectra of different known FITC concentrations and (b) Calibration curve obtained by plotting the fluorescent intensities against the concentrations.

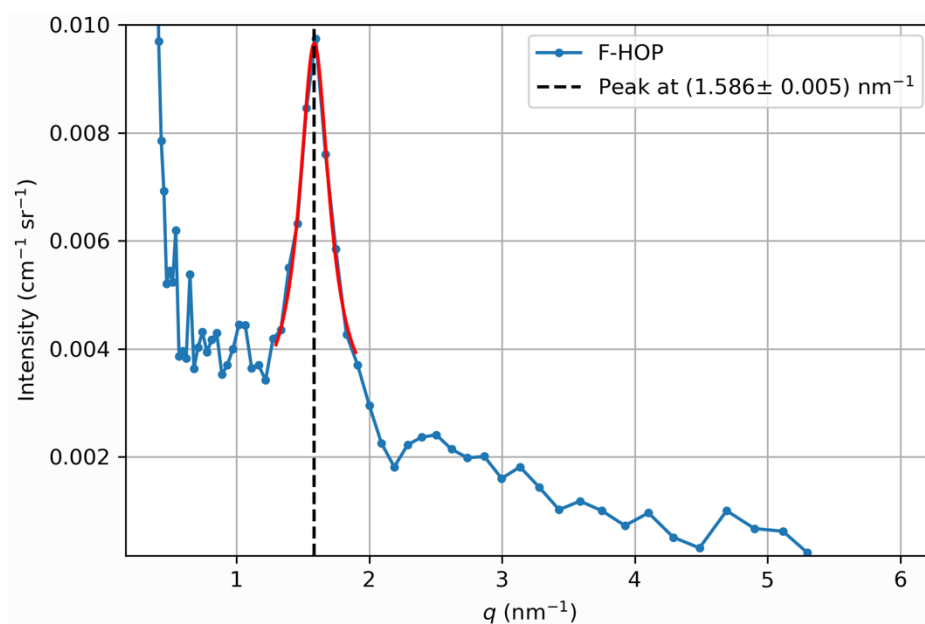

**Figure S5.** SAXS curve of the F-HOP sample. The characteristic peak at  $q = 1.586 \text{ nm}^{-1}$  corresponds to the hexagonal order of the mesopores due to the use of CTAB as a structure-directing agent.

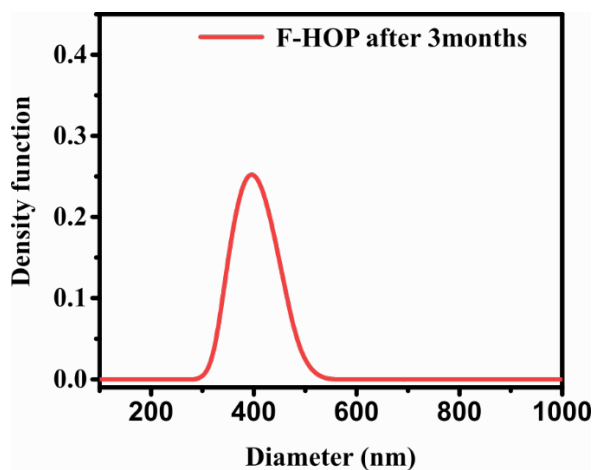

**Figure S6.** Intensity-weighted size distribution of the F-HOP sample 3 months after preparation measured by DLS.
